# Supplementary material
Source: publisher site journal article supplement (https://www.dovepress.com/article/434971)
Supplement: Supplementary file 1 [file get_supplementary_file.php]

**Exploring the cost-utility of a biomarker predicting persistent severe acute kidney injury: The case of C-C motif chemokine ligand 14 (CCL14)**

**Supplementary material**

**Contents**

[1. Model inputs 2](#_Toc152232007)

[1.1 Implementation of model inputs 3](#_Toc152232008)

[1.2 Mortality 4](#_Toc152232009)

[1.3 Utilities 4](#_Toc152232010)

[Targeted literature review 4](#_Toc152232011)

[Calculations 4](#_Toc152232012)

[2. Model validation 4](#_Toc152232013)

[3. Additional results 4](#_Toc152232014)

[3.1 Base case 4](#_Toc152232015)

[4. Scenario analyses 6](#_Toc152232016)

[Scenario 1 6](#_Toc152232017)

[Scenario 2 6](#_Toc152232018)

[Scenario 3 8](#_Toc152232019)

[Scenario 4 8](#_Toc152232020)

[5. References 10](#_Toc152232021)

#

# Model inputs

Table S1 – Mean model inputs, standard errors, and probabilistic distributions assigned for probabilistic sensitivity analysis

| **Input description** | **Mean** | **SE** | **Distribution** | **Source** |
| --- | --- | --- | --- | --- |
| **Diagnostic operating characteristics** | | | | |
| Sensitivity (1.3 ng/ml) | 0.910 | 0.031 | Beta | 2 |
| Specificity (1.3 ng/ml) | 0.510 | 0.033 | Beta |
| **Natural history** | | | | |
| Age at model start | 66 | 8.010 | Normal | 3 |
| Proportion females | 0.497 | 0.001 | Beta |
| Probability of PS-AKI in AKI stage 2 or 3 hospital admissions | 0.244 | 0.001 | Beta |
| **ICU requirements during index admission*** | | | | |
| Probability of ICU use (NPS-AKI) | 0.409 | 0.002 | Beta | 3 |
| OR ICU use (PS-AKI) | 2.150 | 0.014 | Lognormal |
| **Readmission at 30-day*** | | | | |
| Probability of readmission to hospital NPS-AKI (index no ICU) | 0.178 | 0.002 | Beta | 3 |
| Probability of readmission to hospital NPS-AKI (index ICU) | 0.168 | 0.002 | Beta |
| OR 30-day readmission to hospital PS-AKI (index no ICU) | 1.120 | 0.027 | Lognormal |
| OR 30-day readmission to hospital PS-AKI (index ICU) | 1.000 | 0.031 | Lognormal |
| **Outpatient services requirements*** | | | | |
| Probability of outpatient services use NPS-AKI (index no ICU) | 0.262 | 0.002 | Beta | 4 |
| Probability of outpatient services use NPS-AKI (index ICU) | 0.233 | 0.002 | Beta |
| OR 30-day outpatient services PS-AKI (index no ICU) | 1.070 | 0.024 | Lognormal |
| OR 30-day outpatient services PS-AKI (index ICU) | 0.860 | 0.027 | Lognormal |
| **Mortality during Index admission*** | | | | |
| Probability of in-hospital death NPS-AKI (ICU) | 0.150 | 0.002 | Beta | 3 |
| Probability of in-hospital death NPS-AKI (no ICU) | 0.039 | 0.001 | Beta |
| OR in-hospital death PS-AKI (ICU) | 4.420 | 0.022 | Lognormal |
| OR in-hospital death PS-AKI (No ICU) | 4.890 | 0.037 | Lognormal |
| **Mortality during 30-day readmission*** | | | | |
| Probability of 30-day in-patient/outpatient death NPS-AKI (index no ICU) | 0.014 | 0.001 | Beta | 3 |
| Probability of 30-day in-patient/outpatient death NPS-AKI (index ICU) | 0.016 | 0.001 | Beta |
| OR 30-day inpatient/outpatient death PS-AKI (index no ICU) | 1.350 | 0.085 | Lognormal |
| OR 30-day inpatient/outpatient death PS-AKI (index ICU) | 1.290 | 0.085 | Lognormal |
| **Dialysis dependence on index admission*** | | | | |
| Probability of dialysis dependence no ICU (NPS-AKI) | 0.004 | 0.0003 | Beta | 3 |
| Probability of dialysis dependence ICU (NPS-AKI) | 0.004 | 0.0003 | Beta |
| OR dialysis dependence PS-AKI (no ICU) | 14.520 | 0.079 | Lognormal |
| OR dialysis dependence PS-AKI (ICU) | 17.310 | 0.100 | Lognormal |
| **Dialysis dependence at 30-day readmission*** | | | | |
| Probability of dialysis dependence index no ICU - readmission (NPS-AKI) | 0.004 | 0.000 | Beta | 3 |
| Probability of dialysis dependence index ICU - readmission (NPS-AKI) | 0.003 | 0.000 | Beta |
| OR dialysis dependence PS-AKI readmission (index no ICU) | 6.150 | 0.096 | Lognormal |
| OR dialysis dependence PS-AKI readmission (index ICU) | 8.170 | 0.136 | Lognormal |
| **LOS and cost inputs** | | | | |
| **LOS Index admission*** | | | | |
| LOS NPS-AKI (no ICU) (days) | 12.500 | 0.013 | Lognormal | 4 |
| Mean absolute difference no ICU LOS PS-AKI vs NPS-AKI (days) | 3.150 | 0.005 | Lognormal |
| LOS NPS-AKI (ICU) | 8.200 | 0.017 | Lognormal |
| Mean absolute difference LOS ICU PS-AKI vs NPS-AKI (days) | 3.410 | 0.003 | Lognormal |
| **LOS 30-day readmission*** | | | | |
| LOS readmission NPS-AKI (index no ICU) | 7.700 | 0.042 | Lognormal | 4 |
| Mean absolute difference readmission LOS PS-AKI vs NPS-AKI (Index no ICU, days) | 0.850 | 0.003 | Lognormal |
| LOS readmission NPS-AKI (Index ICU) | 8.969 | 0.077 | Lognormal |
| Mean absolute difference readmission LOS PS-AKI vs NPS-AKI (Index ICU, days) | 1.160 | 0.003 | Lognormal |
| **Hospital costs - Index admission*** | | | | |
| Cost NPS-AKI (No ICU) | $17,014 | $28 | Gamma | 4 |
| Mean absolute cost difference Index no ICU PS-AKI vs NPS-AKI | $7,944 | $13 | Gamma |
| Cost NPS-AKI (ICU) | $41,415 | $92 | Gamma |
| Mean absolute cost difference Index ICU PS-AKI vs NPS-AKI | $18,687 | $42 | Gamma |
| **Hospital costs - 30-day readmission*** | | | | |
| Cost readmission NPS-AKI (index no ICU) | $17,271 | $14 | Gamma | 4 |
| Mean absolute cost difference readmission, index no ICU PS-AKI vs NPS-AKI | $3,375 | $3 | Gamma |
| Cost readmission NPS-AKI (index ICU) | $20,099 | $21 | Gamma |
| Mean absolute cost difference readmission, index ICU PS-AKI vs NPS-AKI | $4,704 | $5 | Gamma |
| **Outpatient costs*** | | | | |
| Cost 30-day outpatient NPS-AKI (index no ICU) | $1,884 | $3 | Gamma | 4 |
| Mean absolute cost difference outpatient, index no ICU PS-AKI vs NPS-AKI | $338 | $1 | Gamma |
| Cost 30-day outpatient NPS-AKI (index ICU) | $1,673 | $2 | Gamma |
| Mean absolute cost difference outpatient, index ICU PS-AKI vs NPS-AKI | $85 | $0 | Gamma |
| **Other costs** | | | | |
| Costs of dialysis | $266 | $0 | Not varied | 5 |
| Cost per diagnostic test | $0 | - | - | Assumption |
| Cost of hypothetical intervention | $0 | - | - | Assumption |
| **Utilities** | | | | |
| Ward admission (EQ-5D) | 0.440 | 0.026 | Beta | 6 |
| ICU admission disutility (EQ-5D) | 0.402 | 0.020 | Beta | 7 |
| General population utility 65 to 74, Males (EQ-5D) | 0.827 | 0.026 | Beta | 8 |
| General population utility 65 to 74, Females (EQ-5D) | 0.889 | 0.029 | Beta |
| Post-hospital admission (EQ-5D) | 0.620 | 0.029 | Beta | 6 |
| Disutility dialysis (Review, multiple instruments) | 0.110 | 0.020 | Beta | 9 |
| Alive with renal recovery (TTO) | 0.840 | 0.033 | Beta | 10 |
| Alive on haemodialysis (EQ-5D) | 0.620 | 0.031 | Beta | 11 |
| Alive on peritoneal dialysis (EQ-5D) | 0.680 | 0.070 | Beta |

**Abbreviations**: AKI, acute kidney Injury; EQ-5D, EuroQol-5 Dimension; ICU, intensive care unit; LOS, length-of-stay; NPS-AKI, non-persistent severe acute kidney injury; OR, odds ratios; PS-AKI, persistent severe acute kidney injury; SE, standard error, TTO, time trade-off.

* In the original analyses 3,4 the results were adjusted for age, sex, race-ethnicity, Charlson Comorbidity Index, hospital characteristics (number of beds, teaching status, region, urban/rural), and admission point of origin, admission type, medical vs. surgical (categorized by MS_DRG), primary payer, and presence of CKD, sepsis, and ICU use. Model for ICU use did not adjust for ICU use or sepsis. Models in ICU patients only or non-ICU patients only did not adjust for ICU use.

## Implementation of model inputs

Probabilities were adjusted to the Markov model’s cycle length using Equation S1.

|  | Equation S1 |
| --- | --- |

where *pi* is the probability to be converted, *ti* the index time scale, and *t* is the cycle length to which the probability is to be adjusted 12.

The probability of clinical events and costs values in patients developing PS-AKI were estimated by applying the adjusted OR and mean differences to the baseline probabilities for people not developing PS-AKI (NPS-AKI) 3,4.

Odds ratios (OR) were rearranged to relative risks (RR) before being applied to the baseline probabilities of an event using Equation S13 .

|  | Equation S2 |
| --- | --- |

where *p0* is the baseline probability of the event.

## Mortality

Table S2 – Survival in people with end-stage renal disease aged 65 to 74 years

|  | **Years** | **65-74** |
| --- | --- | --- |
| 2019 | **1** | 0.807 |
| 2018 | **2** | 0.679 |
| 2017 | **3** | 0.564 |
| 2015 | **5** | 0.374 |
| 2010 | **10** | 0.122 |

Source: USRDS report 2022 14

## Utilities

During index admission, patients were assigned the utility of being in the ICU or in a non-ICU environment (ward or intermediate care). After discharge and up to 90 days from index admission, outpatients and people in the community were assigned a post-hospital (re)admission utility. If dialysis dependence existed at this stage, a dialysis disutility was subtracted from the post-hospital admission utility. Because there was no information about the distribution of ICU requirements during hospital readmission, those experiencing readmission were assigned the no ICU utility. For those discharged after readmission, utilities were assigned as described for the initial discharge. After the initial 90-day period, those entering the Markov model were assigned the alive with renal recovery (non-ESRD health state) or the ESRD with dialysis utilities.

### Targeted literature review

Publications reporting utility values were searched in Google and Google Scholar using the terms “cost-effectiveness analysis”, “AKI”, and “systematic review”. Identified manuscripts were inspected for relevant inputs and references were reviewed for additional publications of interest. Tufts Medical Centre Cost-Effectiveness Analysis Registry (University, 2023) was also searched for relevant utility parameters. The search for utilities was terminated when saturation was reached. US-specific utilities derived using EuroQol EQ-5D or other utility-based quality of life tool (i.e., time trade-off or Health Utilities Index) were preferred. Three systematic reviews 15-17 and two health technology assessments 7,18) compiled revised information on published cost-effectiveness analyses of technologies related to AKI and were of particular interest to identify utilities relevant for use in the model. These key publications were inspected for inputs and cross-references of interest. Additional Google Scholar searches were performed until saturation of results was reached.

### Calculations

The utility inputs utilized in the model are depicted in Table S1. The utility for ICU was calculated by subtracting the disutility from ICU admission from the age specific utility for the general US population. The average utility in the general population was weighted using gender distribution in the model (49.7% females). Health state utility for ESRD on dialysis was calculated as the weighted average of the alive on haemodialysis (HD) and alive on peritoneal dialysis (PD) utilities, weighted using 86.8% HD and 13.2% PD distribution 14.

# Model validation

Model structure was validated by clinical experts during model development. Model results were compared with those for similar published studies 7,18,19. The consistency of the model equations was tested by a naïve analyst, and by replacing base case inputs with extreme values, observing if results would be as anticipated. No concerns were raised from the validation process.

# Additional results

## Base case

Table S3 compares base case incremental deterministic and probabilistic results. Probabilistic values were calculated as the average of 10,000 Monte Carlo simulations produced as result of the probabilistic sensitivity analysis.

Table S3 – Base case incremental probabilistic results

| **Incremental result** | **Deterministic** | **Probabilistic** | | |
| --- | --- | --- | --- | --- |
| **Mean** | **Mean** | **Lower 95% CrI** | **Upper 95% CrI** |
| Costs | -$486.21 | -$486.22 | -$516.16 | -$47.58 |
| Life-years | 0.078 | 0.078 | 0.072 | 0.083 |
| QALYs | 0.066 | 0.066 | 0.058 | 0.072 |
| ICER | CCL14 dominates  (-$7,410.35/QALY) | CCL14 dominates  (-$7,425.87 /QALY) | (-$8,115.89 /QALY) | (-$6,906.27 /QALY) |

Abbreviations: CrI, credible interval; ICER, incremental cost-effectiveness ratio; PSA, probabilistic sensitivity analysis; QALY, quality-adjusted life year.

Figure S1 – Cost-effectiveness acceptability curve


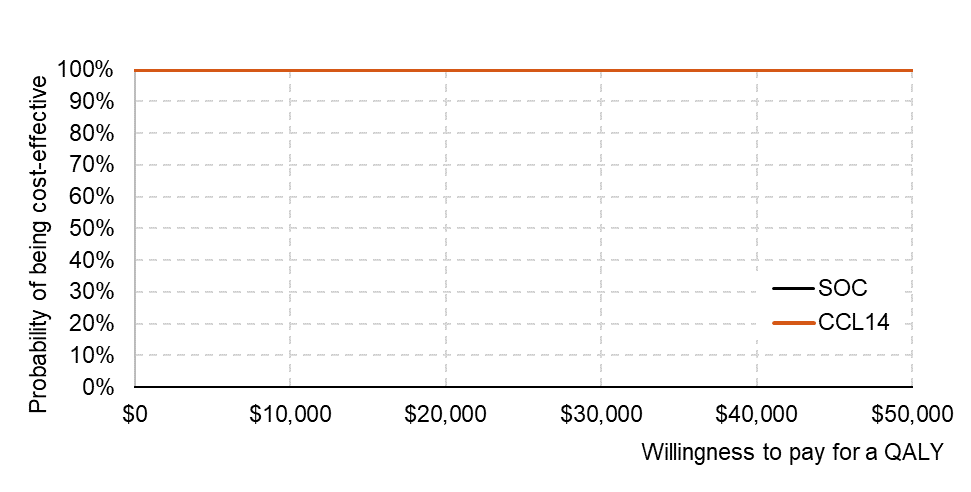


Abbreviations: C-C motif chemokine ligand 14; QALY, quality adjusted life-year; SOC, standard of care

Figure S2 - Distribution of PSA iterations on the cost-effectiveness plane for the base case


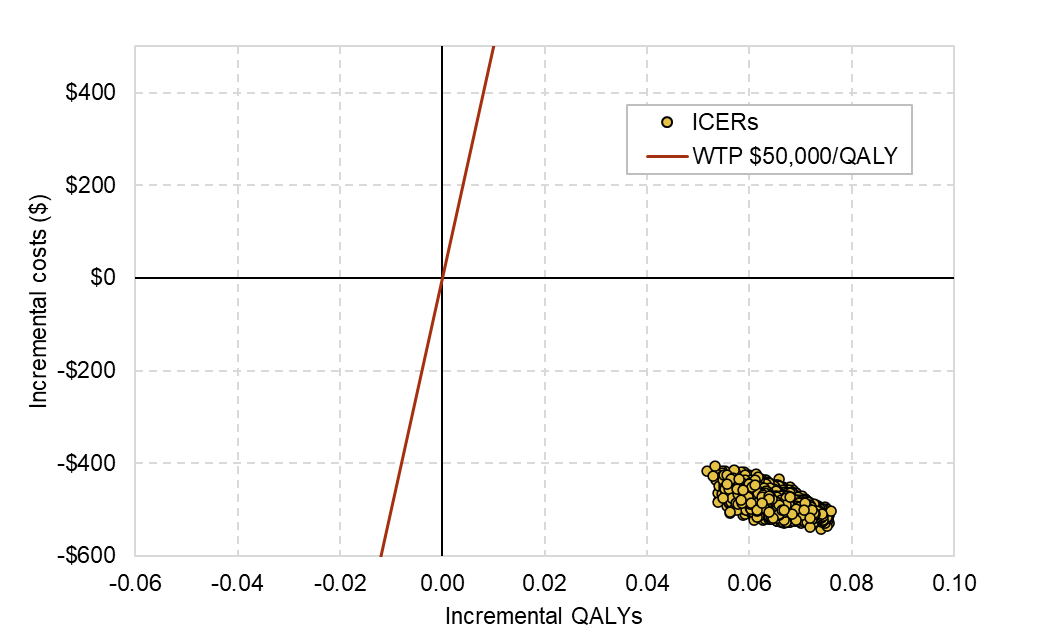


Abbreviations: ICER, incremental cost-effectiveness ratio; PSA, probabilistic sensitivity analysis; QALY, quality-adjusted life year; WTP, willingness to pay for a QALY.

# Scenario analyses

Remaining uncertainty not addressed in one- and two-way sensitivity analyses was explored in scenario analyses.

**Scenario 1** - The time horizon was varied to 10 and 20 years.

**Scenario 2** – The costs of testing ($500) and associated to the intervention ($1,000) were changed simultaneously at intervention efficacy levels of 5% and 10%.

**Scenario 3** - Healthcare costs, other than dialysis costs were considered in the analysis.

**Scenario 4** - The assumption of using 30-day dialysis as a proxy for lifetime dialysis dependence was challenged by modelling kidney function recovery in 50% of people requiring dialysis at 30 days.

### Scenario 1

Reducing the time horizon has shown that most of the costs and life-years are incurred in the initial 10 years of the analysis, whilst only 58% of the QALY gain occurs in the initial 10 years. The elevated mortality for patients with ESRD plays a great role in these results. Although insightful, these results do not change the conclusions of the analysis (Table S4).In addition, this scenario suggests that a greater granularity in simulating the progression of AKI into different degrees of chronic renal disease would provide valuable information about the real value of CCL14 in contributing to the avoidance of progressing kidney disease.

Table S4 – Incremental deterministic results of varying the time horizon of the analysis

|  |  | **Base case (34-year time horizon)** | | | | | | **20-year time horizon** | | | **10-year time horizon** | | |
| --- | --- | --- | --- | --- | --- | --- | --- | --- | --- | --- | --- | --- | --- |
|  | **Outcome** | **CCL14** | **SOC** | **Incremental** | | **CCL14** | | | **SOC** | **Incremental** | **CCL14** | **SOC** | **Incremental** |
| **Costs** | Index Hospitalization (no ICU) | $10,053 | $10,053 | $0 | | $10,053 | | | $10,053 | $0 | $10,053 | $10,053 | $0 |
| Index Hospitalization (ICU) | $21,152 | $21,575 | -$423 | | $21,152 | | | $21,575 | -$423 | $21,152 | $21,575 | -$423 |
| Hospital readmission | $2,885 | $2,881 | $4 | | $2,885 | | | $2,881 | $4 | $2,885 | $2,881 | $4 |
| Total Inpatient costs | **$34,090** | **$34,509** | **-$418** | | **$34,090** | | | **$34,509** | **-$418** | **$34,090** | **$34,509** | **-$418** |
| Outpatient visits | $395 | $393 | $2 | | $395 | | | $393 | $2 | $395 | $393 | $2 |
| Dialysis | $1,058 | $1,127 | -$70 | | $1,058 | | | $1,127 | -$70 | $1,058 | $1,127 | -$70 |
| Total Lifetime Costs | **$1,453** | **$1,521** | **-$68** | | **$1,453** | | | **$1,521** | **-$68** | **$1,453** | **$1,521** | **-$68** |
| Total costs | **$35,543** | **$36,029** | **-$486** | | **$35,543** | | | **$36,029** | **-$486** | **$35,543** | **$36,029** | **-$486** |
| **Effects** | Life-years on dialysis | 0.026 | 0.027 | -0.002 | | 0.026 | | | 0.027 | -0.002 | 0.026 | 0.027 | -0.002 |
| Life-years | 11.118 | 11.040 | 0.078 | | 10.106 | | | 10.036 | 0.071 | 6.569 | 6.524 | 0.045 |
| QALYs | **9.282** | **9.216** | **0.066** | | **8.432** | | | **8.372** | **0.059** | **5.461** | **5.423** | **0.038** |
|  | **ICER ($/QALY)** | **CCL14 Dominates** | | | **-$7,410** | | **CCL14 Dominates** | | | **-$8,174** | **CCL14 Dominates** | | **-$12,779** |

Abbreviations: C-C motif chemokine ligand 14; ICER, incremental cost-effectiveness ratio; Inc., incremental; QALYs, quality-adjusted life-years; SOC, standard of care

### Scenario 2

The costs of testing ($500) and additional costs of the early intervention ($1,000) were varied simultaneously. The deterministic results (Table S5) suggest that the strategy using CCL14 is cost-effective at $9,100.06 per QALY gained.

Table S5 – Incremental deterministic results for Scenario 2

|  |  | **5% Intervention efficacy** | | | **10% Intervention efficacy** | | |
| --- | --- | --- | --- | --- | --- | --- | --- |
| **Outcomes** | **CCL14** | **SOC** | **Incremental** | **CCL14** | **SOC** | **Incremental** |
| **Costs** | Index Hospitalization (no ICU) | $10,634.00 | $10,052.75 | $581.24 | $10,634.45 | $10,052.75 | $581.69 |
| Index Hospitalization (ICU) | $21,870.44 | $21,574.75 | $295.70 | $21,654.31 | $21,574.75 | $79.57 |
| Hospital readmission | $2,883.02 | $2,881.15 | $1.88 | $2,884.90 | $2,881.15 | $3.75 |
| **Total Inpatient costs** | **$35,387.46** | **$34,508.65** | **$878.82** | **$35,173.66** | **$34,508.65** | **$665.01** |
| Outpatient visits | $394.22 | $393.24 | $0.98 | $395.20 | $393.24 | $1.96 |
| Dialysis | $1,092.55 | $1,127.50 | -$34.95 | $1,057.60 | $1,127.50 | -$69.89 |
| **Total Lifetime Costs** | **$1,486.77** | **$1,520.74** | **-$33.97** | **$1,452.80** | **$1,520.74** | **-$67.94** |
| **Total costs** | **$36,874.23** | **$36,029.38** | **$844.85** | **$36,626.46** | **$36,029.38** | **$597.07** |
| **Effects** | Life-years on dialysis | 0.026 | 0.027 | -0.001 | 0.026 | 0.027 | -0.002 |
| Life-years | 11.079 | 11.040 | 0.039 | 11.118 | 11.040 | 0.078 |
| QALYs | **9.249** | **9.216** | **0.033** | **9.282** | **9.216** | **0.066** |
|  | **ICER ($/QALY)** |  | | **$25,752.80** |  |  | **$9,100.06** |

Abbreviations: C-C motif chemokine ligand 14; ICER, incremental cost-effectiveness ratio; QALYs, quality-adjusted life-years; SOC, standard of care.

At a WTP of $9,100.06 per QALY, CCL14 is associated with a 51.7% probability of being the most cost-effective strategy. At WTP values above $12,000 per QALY gained, CCL14 has an over 99.9% probability of being the most cost-effective strategy (Figure S4).

Figure S3 – Distribution of PSA on the cost-effectiveness plane


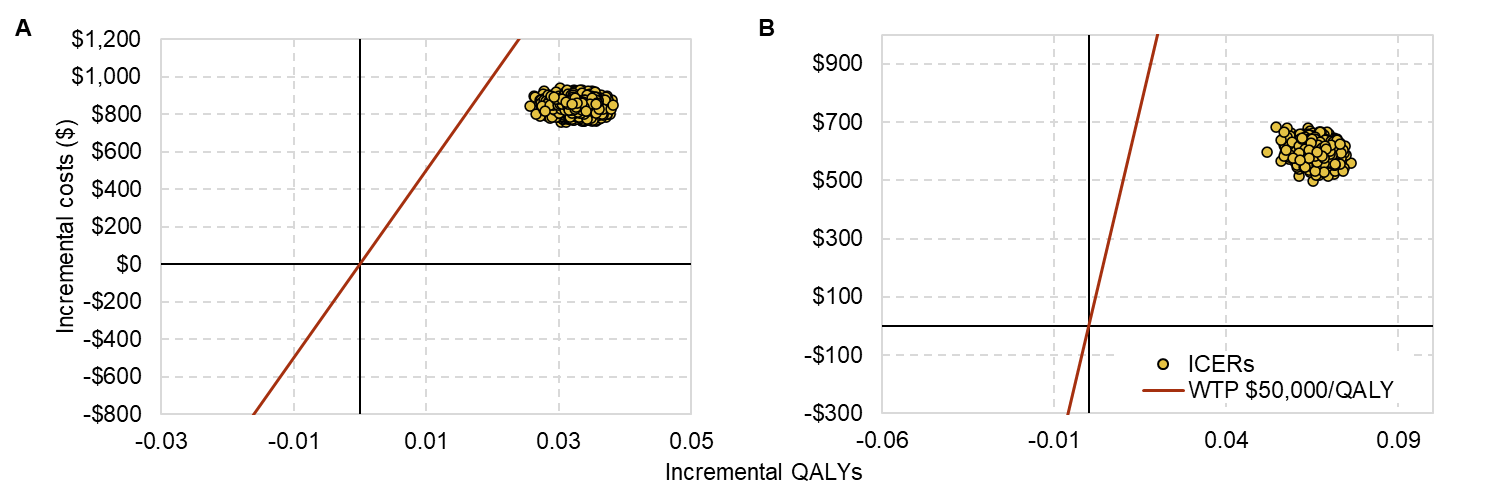


Abbreviations: ICER, incremental cost-effectiveness ratio; PSA, probabilistic sensitivity analysis; QALY, quality-adjusted life year; WTP, willingness to pay for a QALY.

Notes: A – Intervention prevents 5% of PS-AKI; B – Intervention prevents 10% of PS-AKI.

Figure S4 – Cost-effectiveness acceptability curve for Scenario 2


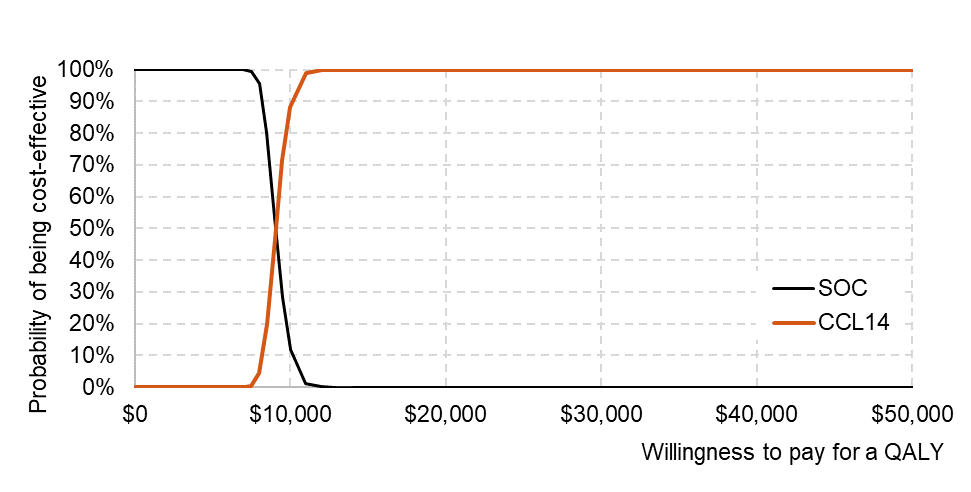


Abbreviations: C-C motif chemokine ligand 14; QALY, quality adjusted life-year; SOC, standard of care.

### Scenario 3

Healthcare costs not restricted to dialysis. In the base case, long-term incremental healthcare costs were restricted to excess dialysis costs between the CCL14 and SOC arms. In scenario 3, healthcare costs for the ESRD group were calculated as direct costs of ESRD reported in US Renal Data System (USRDS) annual report 14 ($95,932) minus the age specific healthcare costs in the general population in 2014 20 inflated to US dollars 2022 using consumer price index for health care 21 ($95,932 - $19,565 = $76,367 for 65- to 84-year-olds, $95,932 - $37,920 = $58,012 for those aged 85 and above).

The deterministic results for scenario 3 are shown in Table S6. CCL14 remains dominant, but the difference in dialysis costs goes from $69.89 to $123.84 (almost doubles). This amount has small absolute value because results are reported per person with AKI stage 2 to 3 entering the model, of which only a relatively small proportion develop dialysis dependence.

Table S6 – Incremental deterministic results for Scenario 3

|  | **Outcomes** | **CCL14** | **SOC** | **Incremental** |
| --- | --- | --- | --- | --- |
| **Costs** | Index Hospitalization (no ICU) | $10,053.25 | $10,052.75 | $0.49 |
| Index Hospitalization (ICU) | $21,152.23 | $21,574.75 | -$422.52 |
| Hospital readmission | $2,884.90 | $2,881.15 | $3.75 |
| **Total Inpatient costs** | **$34,090.37** | **$34,508.65** | **-$418.27** |
| Outpatient visits | $395.20 | $393.24 | $1.96 |
| Dialysis | $1,873.27 | $1,997.12 | -$123.84 |
| **Total Lifetime Costs** | **$2,268.47** | **$2,390.36** | **-$121.89** |
| **Total costs** | **$36,358.84** | **$36,899.01** | **-$540.16** |
| **Effects** | Life-years on dialysis | 0.026 | 0.027 | -0.002 |
| Life-years | 11.118 | 11.040 | 0.078 |
| **QALYs** | **9.282** | **9.216** | **0.066** |
|  | **ICER ($/QALY)** | **CCL14 Dominates** | | **-$8,232.62** |

Abbreviations: C-C motif chemokine ligand 14; ICER, incremental cost-effectiveness ratio; QALYs, quality-adjusted life-years; SOC, standard of care.

### Scenario 4

The base case assumption that 30-day dialysis use was a proxy for lifetime dialysis dependence was challenged by modelling kidney function recovery in 50% of people requiring dialysis at 30 days.

The incremental deterministic results for scenario 4 are shown in Table S7. The results are similar to the base case with CCL14 with the cost of dialysis reducing to $38.62.

Table S7 - Incremental deterministic results for Scenario 4

|  | **Outcomes** | **CCL14** | **SOC** | **Incremental** |
| --- | --- | --- | --- | --- |
| **Costs** | Index Hospitalization (no ICU) | $10,053.25 | $10,052.75 | $0.49 |
| Index Hospitalization (ICU) | $21,152.23 | $21,574.75 | -$422.52 |
| Hospital readmission | $2,884.90 | $2,881.15 | $3.75 |
| **Total Inpatient costs** | **$34,090.37** | **$34,508.65** | **-$418.27** |
| Outpatient visits | $395.20 | $393.24 | $1.96 |
| Dialysis | $594.18 | $632.80 | -$38.62 |
| **Total Lifetime Costs** | **$989.38** | **$1,026.04** | **-$36.67** |
| **Total costs** | **$35,079.75** | **$35,534.69** | **-$454.94** |
| **Effects** | Life-years on dialysis | 0.014 | 0.015 | -0.001 |
| Life-years | 11.167 | 11.092 | 0.075 |
| **QALYs** | **9.324** | **9.262** | **0.063** |
|  | **ICER ($/QALY)** | **CCL14 Dominates** | | **-$7,250.22** |

# References

1. International Society of Nephrology. KDIGO Clinical Practice Guideline for Acute Kidney Injury. Injury. Kidney Int. Suppl. Web site. <https://kdigo.org/wp-content/uploads/2016/10/KDIGO-2012-AKI-Guideline-English.pdf>. Published 2012. Accessed.

2. Koyner JL, Chawla LS, Bihorac A, et al. Performance of a Standardized Clinical Assay for Urinary C-C Motif Chemokine Ligand 14 (CCL14) for Persistent Severe Acute Kidney Injury. *Kidney360.* 2022;3(7):1158-1168.

3. Koyner JL, Mackey RH, Rosenthal NA, et al. Clinical outcomes of persistent severe acute kidney injury among patients with KDIGO stage 2 or 3 AKI. *American Journal of Nephrology.* 2022.

4. Koyner JL, Mackey RH, Rosenthal NA, et al. Healthcare resource utilization and costs of persistent severe AKI among hospitalized Stage 2/3 AKI patients. *Kidney360.* 2022.

5. CMS. Calendar Year 2023 End-Stage Renal Disease (ESRD) Prospective Payment System (PPS) Final Rule (CMS-1768-F). <https://www.cms.gov/newsroom/fact-sheets/calendar-year-2023-end-stage-renal-disease-esrd-prospective-payment-system-pps-final-rule-cms-1768-f>. Published 2023. Accessed 11/01/2023.

6. Hernández RA, Jenkinson D, Vale L, Cuthbertson BH. Economic evaluation of nurse-led intensive care follow-up programmes compared with standard care: the PRaCTICaL trial. *Eur J Health Econ.* 2014;15(3):243-252.

7. Hall PS, Mitchell ED, Smith AF, et al. The future for diagnostic tests of acute kidney injury in critical care: evidence synthesis, care pathway analysis and research prioritisation. *Health Technol Assess.* 2018;22(32):1-274.

8. Jiang R, Janssen MFB, Pickard AS. US population norms for the EQ-5D-5L and comparison of norms from face-to-face and online samples. *Qual Life Res.* 2021;30(3):803-816.

9. Wyld M, Morton RL, Hayen A, Howard K, Webster AC. A systematic review and meta-analysis of utility-based quality of life in chronic kidney disease treatments. *PLoS Med.* 2012;9(9):e1001307.

10. Hamel MB, Phillips RS, Davis RB, et al. Outcomes and cost-effectiveness of initiating dialysis and continuing aggressive care in seriously ill hospitalized adults. SUPPORT Investigators. Study to Understand Prognoses and Preferences for Outcomes and Risks of Treatments. *Ann Intern Med.* 1997;127(3):195-202.

11. Manns B, Johnson JA, Taub K, Mortis G, Ghali WA, Donaldson C. Quality of life in patients treated with hemodialysis or peritoneal dialysis: what are the important determinants? *Clin Nephrol.* 2003;60(5):341-351.

12. Briggs A, Sculpher M, Claxton K. *Decision modelling for health economic evaluation.* Oxford University Pres; 2006.

13. Gidwani R, Russell LB. Estimating Transition Probabilities from Published Evidence: A Tutorial for Decision Modelers. *Pharmacoeconomics.* 2020;38(11):1153-1164.

14. United States Renal Data System. USRDS Annual Data Report: Epidemiology of kidney disease in the United States. <https://adr.usrds.org/2022>. Published 2022. Updated, 2022. Accessed 10/11/2022.

15. Singh A, Hussain S, Kher V, Palmer AJ, Jose M, Antony B. A systematic review of cost-effectiveness analyses of continuous versus intermittent renal replacement therapy in acute kidney injury. *Expert Rev Pharmacoecon Outcomes Res.* 2022;22(1):27-35.

16. Sugrue DM, Ward T, Rai S, McEwan P, van Haalen HGM. Economic Modelling of Chronic Kidney Disease: A Systematic Literature Review to Inform Conceptual Model Design. *Pharmacoeconomics.* 2019;37(12):1451-1468.

17. Suh K, Kellum JA, Kane-Gill SL. A systematic review of cost-effectiveness analyses across the acute kidney injury landscape. *Expert Review of Pharmacoeconomics & Outcomes Research.* 2021;21(4):571-578.

18. Brazzelli M, Aucott L, Aceves-Martins M, et al. Biomarkers for assessing acute kidney injury for people who are being considered for admission to critical care: a systematic review and cost-effectiveness analysis. *Health Technol Assess.* 2022;26(7):1-286.

19. Jacobsen E, Sawhney S, Brazzelli M, et al. Cost-effectiveness and value of information analysis of NephroCheck and NGAL tests compared to standard care for the diagnosis of acute kidney injury. *BMC Nephrology.* 2021;22(1):399.

20. Centers for Medicare & Medicaid Services. Total Personal Health Care Per-capita Spending by Gender and Age Group, Calendar Years. <https://www.cms.gov/Research-Statistics-Data-and-Systems/Statistics-Trends-and-Reports/NationalHealthExpendData/Age-and-Gender>. Published 2021. Accessed 11/01/2023.

21. US Bureau of Economic Analysis. Table 2.3.4. Price Indexes for Personal Consumption Expenditures by Major Type of Product. <https://apps.bea.gov/iTable/?reqid=19&step=3&isuri=1&1921=survey&1903=84#eyJhcHBpZCI6MTksInN0ZXBzIjpbMSwyLDMsM10sImRhdGEiOltbIk5JUEFfVGFibGVfTGlzdCIsIjY0Il0sWyJDYXRlZ29yaWVzIiwiU3VydmV5Il0sWyJGaXJzdF9ZZWFyIiwiMjAyMCJdLFsiTGFzdF9ZZWFyIiwiMjAyMiJdLFsiU2NhbGUiLCIwIl0sWyJTZXJpZXMiLCJBIl1dfQ>==. Published 2022. Accessed 11/01/2023.
